# Supplementary material for: Efficient dehydrogenation of high-concentration formic acid over PdAu/AC-NH2 catalysts without additives under ambient conditions
Source: Royal Society of Chemistry journal article supplement (doi:10.1039/d2nj04891d), 2022-11-30
Supplement: d2nj04891d1.pdf [file d2nj04891d1.pdf]

**Efficient dehydrogenation of high concentration formic acid over PdAu/AC-NH<sub>2</sub>  
catalyst without additives under ambient conditions**

Shuchao Jiang,<sup>a</sup> Guoqing Ren,<sup>\*a</sup> Tie Yu,<sup>\*a</sup>

*<sup>a</sup> Institute of Molecular Science and Engineering, Institute of Frontier and Interdisciplinary Science,  
Shandong University, Qingdao, Shandong, 266237, China.*

Corresponding authors:

Guoqing Ren: [renguoqing@sdu.edu.cn](mailto:renguoqing@sdu.edu.cn); Tie Yu: [yutie043116@tju.edu.cn](mailto:yutie043116@tju.edu.cn)

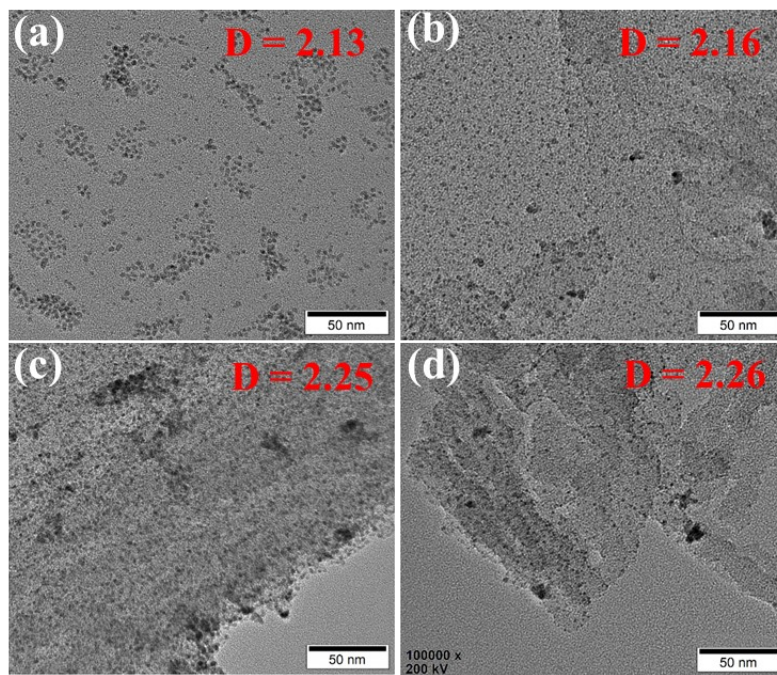

**Fig. S1** TEM images of (a) Pd/AC-NH<sub>2</sub>, (b) Pd<sub>4</sub>Au<sub>1</sub>/AC-NH<sub>2</sub>, (c) Pd<sub>2</sub>Au<sub>3</sub>/AC-NH<sub>2</sub> and (d) Pd<sub>1</sub>Au<sub>4</sub>/AC-NH<sub>2</sub>.

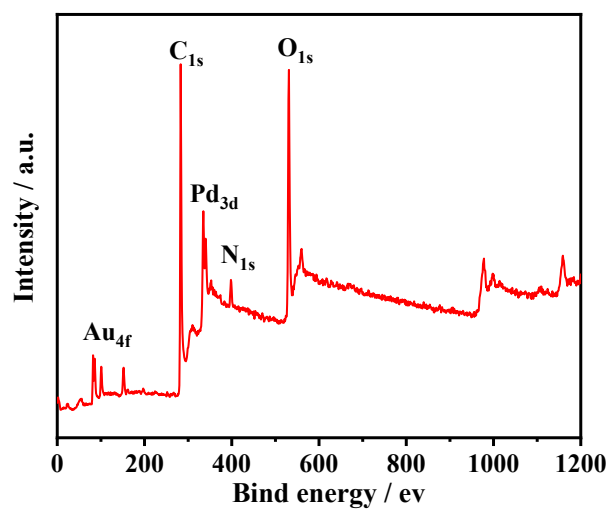

Fig. S2 Survey XPS characterization of Pd<sub>3</sub>Au<sub>2</sub>/AC-NH<sub>2</sub>.

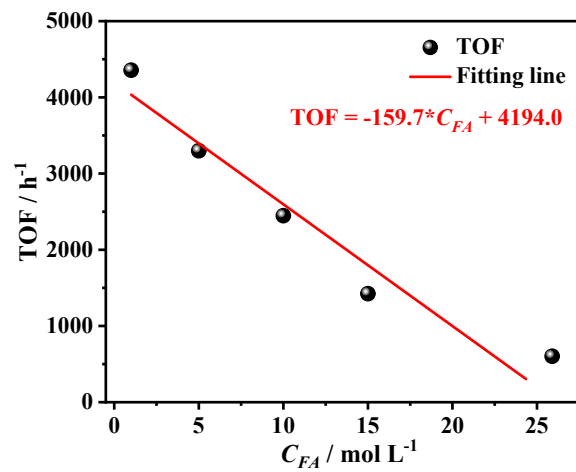

Fig. S3 TOF values' change with the concentration of FA at 303 K.

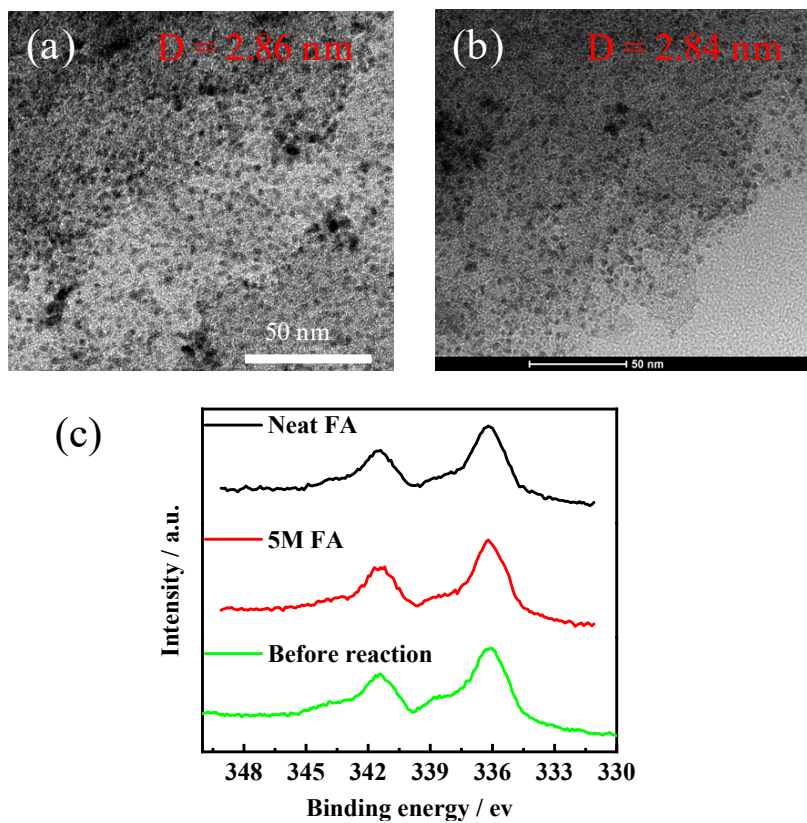

**Fig. S4** TEM image of Pd<sub>3</sub>Au<sub>2</sub>/AC-NH<sub>2</sub> after 3 cycles of 5 M FA dehydrogenation (a) and neat FA (b). XPS spectra of Pd<sub>3</sub>Au<sub>2</sub>/AC-NH<sub>2</sub> before reaction and after 3 cycles of 5 M FA dehydrogenation and neat FA at 303 K.

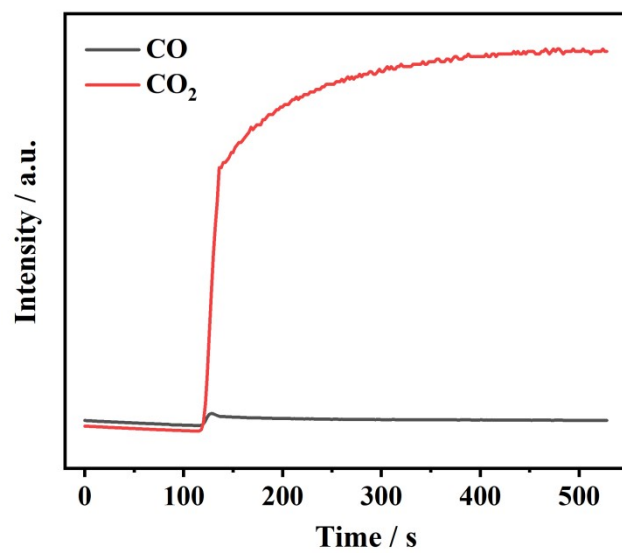

**Fig. S5** Mass spectrum (MS) of gas products over Pd<sub>3</sub>Au<sub>2</sub>/AC-NH<sub>2</sub> using He carrier gas (Neat FA, 1 mL, 303 K).

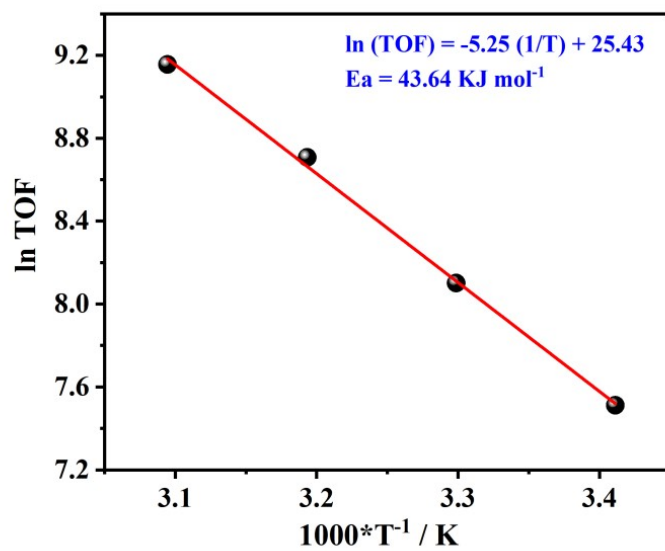

**Fig. S6** Arrhenius plot (ln (TOF) vs. 1000\*1/T of Pd<sub>3</sub>Au<sub>2</sub>/AC-NH<sub>2</sub> catalyst.

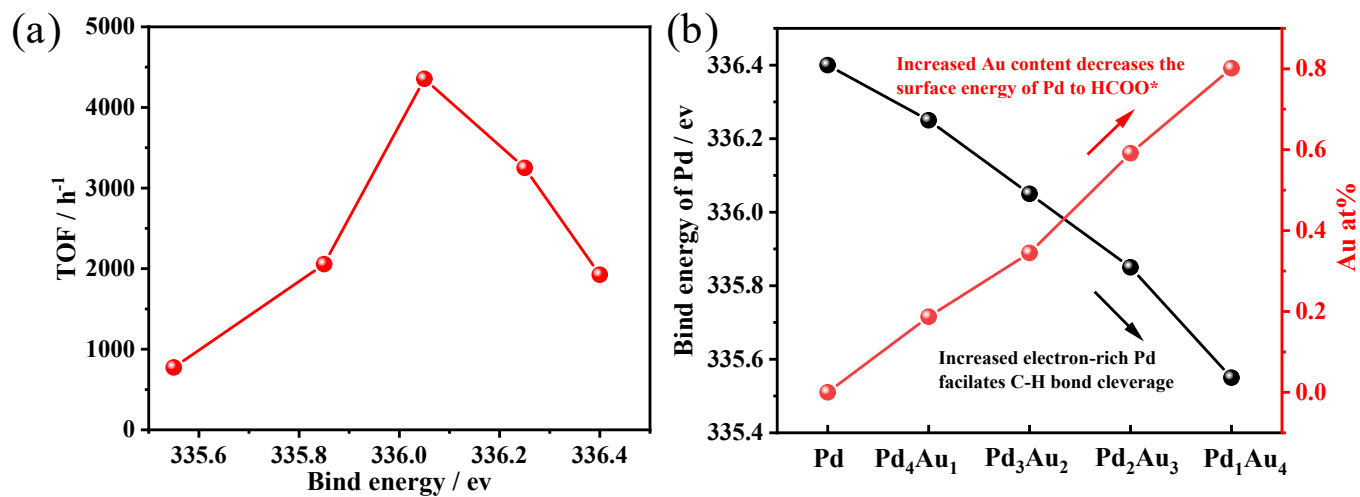

**Fig. S7** (a) The relationship between TOF values and Pd binding energy. (b) A trade-off relation between Pd bind energy and surface energy as a function of Au content.



**Table S1** ICP results of the as prepared catalysts.

| Catalyst                                                              | Pd / wt. % | Au / wt. % | Mole ratio of Pd/Au |
|-----------------------------------------------------------------------|------------|------------|---------------------|
| Pd/AC-NH <sub>2</sub>                                                 | 3.39       | /          | /                   |
| Pd <sub>4</sub> Au <sub>1</sub> /AC-NH <sub>2</sub>                   | 2.95       | 1.26       | 4.35                |
| Pd <sub>3</sub> Au <sub>2</sub> /AC-NH <sub>2</sub>                   | 2.26       | 2.21       | 1.90                |
| Pd <sub>2</sub> Au <sub>3</sub> /AC-NH <sub>2</sub>                   | 1.57       | 4.22       | 0.69                |
| Pd <sub>1</sub> Au <sub>4</sub> /AC-NH <sub>2</sub>                   | 0.75       | 5.62       | 0.24                |
| Pd <sub>3</sub> Au <sub>2</sub> /AC                                   | 2.41       | 2.38       | 1.88                |
| Used Pd <sub>3</sub> Au <sub>2</sub> /AC-NH <sub>2</sub> <sup>a</sup> | 2.13       | 2.11       | 1.78                |

<sup>a</sup> ICP results of Pd<sub>3</sub>Au<sub>2</sub>/AC-NH<sub>2</sub> after three cycles of neat FA dehydrogenation at 303 K.

**Table S2** The textural properties of various samples measured by N<sub>2</sub> adsorption/desorption isotherms.

| Different stages                                    | S <sub>BET</sub> / m <sup>2</sup> g <sup>-1</sup> | Pore volume / cm <sup>3</sup> g <sup>-1</sup> | Pore size / nm |
|-----------------------------------------------------|---------------------------------------------------|-----------------------------------------------|----------------|
| AC                                                  | 939                                               | 0.66                                          | 5.34           |
| Pd <sub>3</sub> Au <sub>2</sub> /AC                 | 877                                               | 0.63                                          | 5.34           |
| AC-NH <sub>2</sub>                                  | 421                                               | 0.50                                          | 5.22           |
| Pd <sub>3</sub> Au <sub>2</sub> /AC-NH <sub>2</sub> | 399                                               | 0.43                                          | 5.75           |

**Table S3** Elemental content analysis of Pd<sub>3</sub>Au<sub>2</sub>/AC-NH<sub>2</sub>.

| Samples                                                               | C / wt. % | H / wt. % | N <sup>a</sup> / wt. % | N <sup>b</sup> / wt. % |
|-----------------------------------------------------------------------|-----------|-----------|------------------------|------------------------|
| Fresh Pd <sub>3</sub> Au <sub>2</sub> /AC-NH <sub>2</sub>             | 63.57     | 3.52      | 2.88                   | 5.23                   |
| Used Pd <sub>3</sub> Au <sub>2</sub> /AC-NH <sub>2</sub> <sup>c</sup> | 64.15     | 2.44      | 2.44                   | /                      |

*a* Determined by Element Analysis (EA). *b* Determined by survey XPS. *c* Elemental content analysis of Pd<sub>3</sub>Au<sub>2</sub>/AC-

NH<sub>2</sub> after three cycles of neat FA dehydrogenation at 303 K.

**Table S4** Catalytic activities of reported catalysts for the dehydrogenation of formic acid.

| Catalyst                                                      | Temp. / K | Additives   | TOF / h <sup>-1</sup> | Ref.      |
|---------------------------------------------------------------|-----------|-------------|-----------------------|-----------|
|                                                               | 293       | 5 M FA      | 1830 <sup>b</sup>     |           |
|                                                               | 303       | 5 M FA      | 3300 <sup>b</sup>     |           |
| Pd <sub>3</sub> Au <sub>2</sub> /AC-NH <sub>2</sub>           | 313       | 5 M FA      | 5730 <sup>b</sup>     | this work |
|                                                               | 323       | 5 M FA      | 8710 <sup>b</sup>     |           |
|                                                               | 303       | 1 M FA      | 4355 <sup>a</sup>     |           |
|                                                               | 303       | Neat FA     | 603 <sup>b</sup>      |           |
| Pd <sub>0.85</sub> Ir <sub>0.15</sub> /SBA-15-NH <sub>2</sub> | 298       | 1 M FA      | 1500 <sup>b</sup>     |           |
| PdMn <sub>0.6</sub> @S-1                                      | 298       | 1 M FA      | 610 <sup>b</sup>      | 6         |
| Ni <sub>0.4</sub> Pd <sub>0.6</sub> /NH <sub>2</sub> -N-rGO   | 298       | 1 M FA      | 954 <sup>b</sup>      | 16        |
| Au <sub>1</sub> Pd <sub>1.5</sub> /MIL-101-NH <sub>2</sub>    | 298       | 1 M FA / SF | 526 <sup>b</sup>      | 33        |
| Pd <sub>1</sub> Au <sub>1</sub> /72-LA                        | 303       | 1 M FA / SF | 3583 <sup>a</sup>     | 37        |
| Au <sub>2</sub> Pd <sub>3</sub> @(P)N-C                       | 303       | 1 M FA      | 358 <sup>a</sup>      | 32        |
| Pd@SS-CNR                                                     | 303       | 1 M FA / SF | 1878 <sup>b</sup>     | 30        |
| Pd/CZIF-8-950                                                 | 303       | 1 M FA / SF | 1166 <sup>b</sup>     | 49        |
| Pd@Bi <sub>0.11</sub> /C                                      | 313       | 1 M FA / SF | 4100 <sup>b</sup>     | 31        |
| Pd@CN900K                                                     | 323       | 1 M FA / SF | 8000 <sup>a</sup>     | 14        |
| 0.8Pd-0.2Ni(OH) <sub>2</sub> @S-1                             | 333       | 1 M FA / SF | 5803 <sup>b</sup>     | 39        |
| (Co <sub>6</sub> )Ag <sub>0.1</sub> Pd <sub>0.9</sub> /rGO    | 333       | 1 M FA / SF | 2739 <sup>b</sup>     | 15        |
| Pd <sub>0.6</sub> Ag <sub>0.4</sub> @ZrO <sub>2</sub> /C/rGO  | 333       | 1 M FA / SF | 4300 <sup>b</sup>     | 38        |
| Au@SiO <sub>2</sub>                                           | 403       | 1 M FA      | 403 <sup>b</sup>      | 45        |
| Pd/C                                                          | 293       | 6.6 M       | 87 <sup>b</sup>       | 29        |

|                                                             |     |               |                   |    |
|-------------------------------------------------------------|-----|---------------|-------------------|----|
| CoAgPd/MIL-101                                              | 323 | 1.5 M FA / SF | 98 <sup>b</sup>   | 40 |
| AgPd/0.2CND/SBA-15                                          | 323 | 1.5 M FA / SF | 893 <sup>b</sup>  | 35 |
| Pd/XC-72R                                                   | 333 | 2.6 M FA / SF | 7256 <sup>b</sup> | 30 |
| Au/m-ZrO <sub>2</sub>                                       | 353 | 10.5 M FA     | 660 <sup>b</sup>  | 46 |
| Au/SiO <sub>2</sub> -Schiff                                 | 323 | 10 M FA       | 4683 <sup>b</sup> | 47 |
| Pd <sub>60</sub> Au <sub>40</sub> /HPC-NH <sub>2</sub>      | 298 | 1 M FA        | 3763 <sup>b</sup> | 57 |
| Au <sub>0.5</sub> Pd <sub>0.5</sub> /NH <sub>2</sub> -N-rGO | 298 | 1 M FA        | 4446 <sup>b</sup> | 43 |
| Pd <sub>60</sub> Au <sub>40</sub> /ZrSBA-15-AP              | 298 | 2 M FA        | 1185 <sup>b</sup> | 41 |
| Au <sub>0.4</sub> Pd <sub>0.6</sub> /CBH-A                  | 298 | 1 M FA        | 5625 <sup>b</sup> | 42 |

a: TOF value was calculated based on the completion time of gas releasing.

b: Initial TOF was calculated based on the initial conversion of FA.

SF: Sodium Formate.
